# Supplementary material
Source: PubMed Central journal article supplement (PMC5406954)

**Table S1**—Prevalence, sensitivity, specificity, and positive (PPV) and negative (NPV) predictive values for different cut-offs of AHI\* from the HST (Nox-T3<sub>home</sub>) and in-lab portable monitor recording (Nox-T3<sub>lab</sub>) versus the PSG.

| Measure                           | Prevalence | Sensitivity | Exact 95% CI |      | Specificity | Exact 95% CI |      | PPV  | NPV  |
|-----------------------------------|------------|-------------|--------------|------|-------------|--------------|------|------|------|
|                                   |            |             | LB           | UB   |             | LB           | UB   |      |      |
| Nox-T3 <sub>home</sub> versus PSG |            |             |              |      |             |              |      |      |      |
| <b>AHI, events/h</b>              |            |             |              |      |             |              |      |      |      |
| ≥5                                | 0.94       | 0.99        | 0.93         | 1.00 | 0.40        | 0.05         | 0.85 | 0.96 | 0.67 |
| ≥10                               | 0.84       | 0.89        | 0.79         | 0.96 | 0.75        | 0.43         | 0.95 | 0.95 | 0.56 |
| ≥15                               | 0.68       | 0.92        | 0.81         | 0.98 | 0.80        | 0.59         | 0.93 | 0.91 | 0.83 |
| ≥30                               | 0.48       | 0.70        | 0.53         | 0.84 | 0.98        | 0.87         | 1.00 | 0.96 | 0.78 |
| Nox-T3 <sub>lab</sub> versus PSG  |            |             |              |      |             |              |      |      |      |
| <b>AHI, events/h</b>              |            |             |              |      |             |              |      |      |      |
| ≥5                                | 0.93       | 1.00        | 0.95         | 1.00 | 0.40        | 0.05         | 0.85 | 0.96 | 1.00 |
| ≥10                               | 0.86       | 0.92        | 0.83         | 0.97 | 0.73        | 0.39         | 0.94 | 0.95 | 0.62 |
| ≥15                               | 0.68       | 0.96        | 0.87         | 1.00 | 0.83        | 0.63         | 0.95 | 0.93 | 0.91 |
| ≥30                               | 0.47       | 0.94        | 0.81         | 0.99 | 0.95        | 0.83         | 0.99 | 0.94 | 0.95 |

\* = Scoring of hypopneas on the Nox-T3 recordings required a ≥ 3% oxygen desaturation event; hypopneas on the PSG required a ≥ 3% oxygen desaturation event and/or an arousal. AHI = apnea-hypopnea index, CI = confidence interval, LB = lower bound, UB = upper bound, PPV = positive predictive value, NPV = negative predictive value.

**Table S2**—Number of apnea events in automatic and manual scoring of home sleep test (Nox-T3<sub>home</sub>) and in-laboratory portable monitor recording (Nox-T3<sub>lab</sub>).

| Measure                      | Manual Scoring |               | Automatic Scoring |               | Difference* |             |       |
|------------------------------|----------------|---------------|-------------------|---------------|-------------|-------------|-------|
|                              | N              | Mean ± SD     | N                 | Mean ± SD     | N           | Mean ± SD   | P ‡   |
| <b>Nox-T3<sub>home</sub></b> |                |               |                   |               |             |             |       |
| Total apneas                 | 77             | 151.1 ± 165.3 | 77                | 144.4 ± 162.0 | 77          | -6.7 ± 30.0 | 0.053 |
| Obstructive apneas           | 77             | 133.8 ± 147.0 | 77                | 130.3 ± 150.2 | 77          | -3.5 ± 29.3 | 0.301 |
| Central apneas               | 77             | 5.3 ± 11.4    | 77                | 5.9 ± 14.0    | 77          | 0.6 ± 5.6   | 0.339 |
| Mixed apneas                 | 77             | 12.1 ± 29.0   | 77                | 8.2 ± 17.3    | 77          | -3.9 ± 17.1 | 0.051 |
| <b>Nox-T3<sub>lab</sub></b>  |                |               |                   |               |             |             |       |
| Total apneas                 | 76             | 176.2 ± 179.2 | 76                | 177.2 ± 187.3 | 76          | 1.0 ± 32.9  | 0.794 |
| Obstructive apneas           | 76             | 151.7 ± 155.3 | 76                | 152.9 ± 165.5 | 76          | 1.2 ± 33.6  | 0.752 |
| Central apneas               | 76             | 9.0 ± 21.5    | 76                | 11.7 ± 32.0   | 76          | 2.7 ± 11.9  | 0.051 |
| Mixed apneas                 | 76             | 15.6 ± 32.3   | 76                | 12.6 ± 28.2   | 76          | -2.9 ± 8.0  | 0.002 |

\* = Difference calculated as auto-scored value minus manually scored value.

‡ = P value from paired t test.

**Figure S1**—Bland Altman (panels A and C) and identity (panels B and D) plots of manually edited AHI on PSG compared to HSAT (Nox-T3<sub>home</sub>, panels A and B) and in-laboratory portable monitor recording [Nox-T3<sub>lab</sub>, panels C and D). Scoring of hypopneas on the HSAT and in-laboratory portable monitor recordings required an oxygen desaturation event of 3% or greater. Scoring of hypopneas on the PSG required an oxygen desaturation event of  $\geq 3\%$  and/or an arousal.

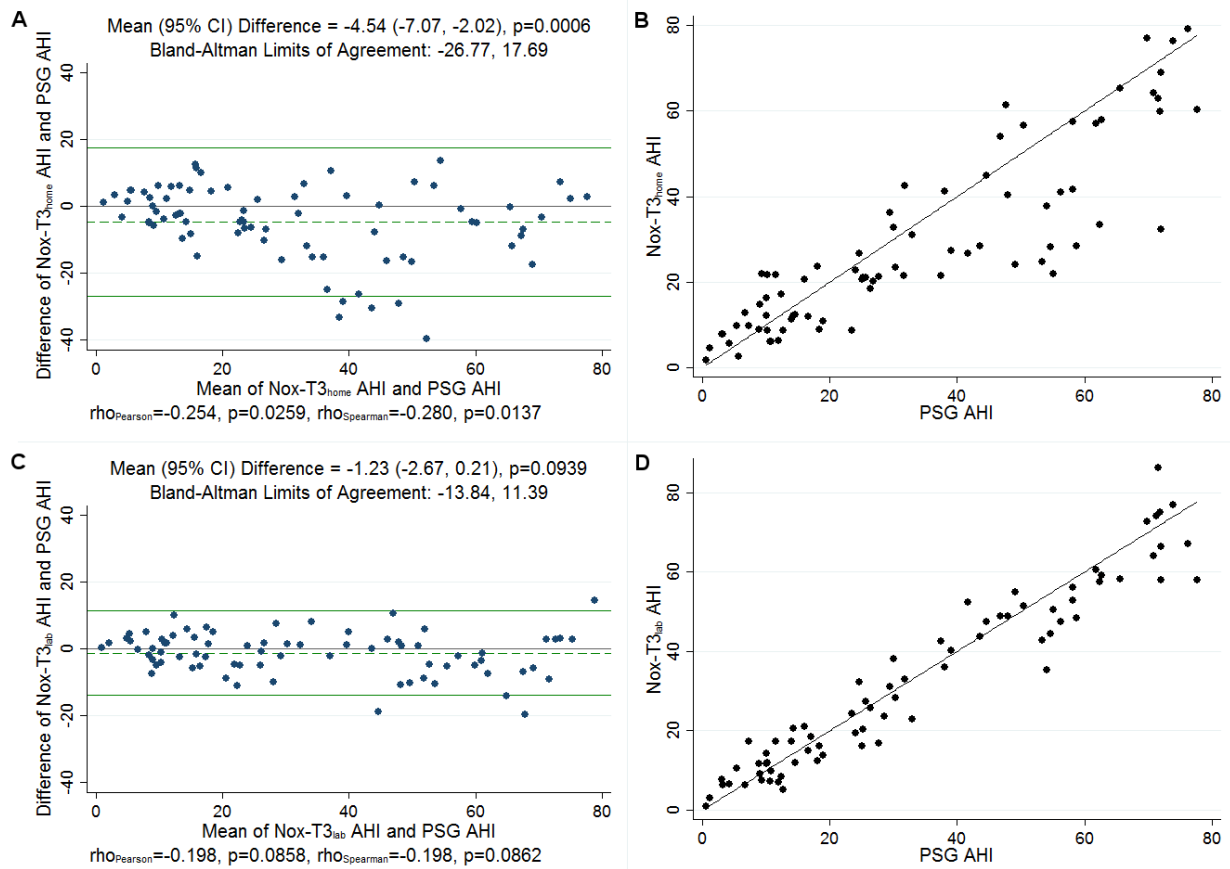

Supplement: jcsm.13.05.675s1.pdf [file jcsm.13.05.675s1.pdf]
